# Supplementary material for: Significant relaxation of SARS-CoV-2-targeted non-pharmaceutical interventions may result in profound mortality: A New York state modelling study
Source: PLOS journal article supplement (doi:10.1371/journal.pone.0239647), 2020-09-24
Supplement: S3 (10.1371/journal.pone.0239647.s003) [file journal.pone.0239647.s003]

**S2 Table. Fit Parameters**

| Parameter     | Definition                                           | Value | 95% Confidence Interval |
|---------------|------------------------------------------------------|-------|-------------------------|
| $\alpha$      | Effective protection rate                            | 0.105 | (0.095, 0.112)          |
| $\zeta$       | Effective protection leak rate                       | 0.016 | (0.012, 0.018)          |
| $\beta$       | Effective contact rate                               | 0.281 | (0.269, 0.285)          |
| $\lambda$     | Initial effective hospitalized recovery rate         | 0.174 | (0.166, 0.200)          |
| $\varepsilon$ | Hospitalized recovery rate improvement rate constant | 0.226 | (0.191, 0.312)          |
| $\sigma$      | Efficacy of improved recovery rate                   | 0.513 | (0.405, 0.575)          |
| $\kappa$      | Initial effective death rate                         | 0.098 | (0.092, 0.114)          |
| $\psi$        | Death rate improvement rate constant                 | 0.404 | (0.313, 0.438)          |
| $\mu$         | Efficacy of reduced death rate                       | 2.75  | (2.465, 3.096)          |
